# Supplementary material
Source: Springer Nature journal article supplement (https://www.springermedizin.de/resource/supplementary/12891_2014_2350_MOESM4_ESM.pdf/9510036)

**a** 25-mm baseplate

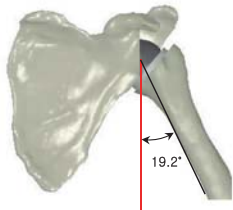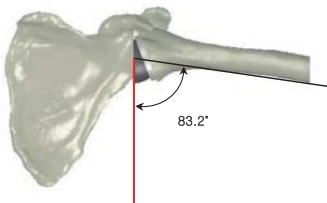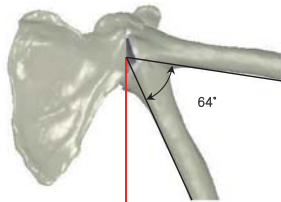

**b** 29-mm baseplate

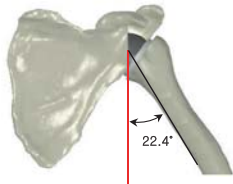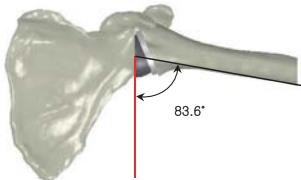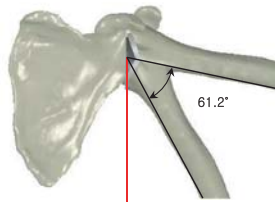

Supplement: MOESM4 [file 9510036]
